# Supplementary material for: Heterometal–organic frameworks as highly sensitive and highly selective luminescent probes to detect I−ions in aqueous solutions
Source: Royal Society of Chemistry journal article supplement (doi:10.1039/c4cc09081k), 2015-01-01
Supplement: c4cc09081k1.pdf [file c4cc09081k1.pdf]

## Supplementary Information

### **Heterometal-organic frameworks as highly sensitive and highly selective luminescent probes to detect I<sup>-</sup> ions in aqueous solutions**

Peng-Fei Shi<sup>ab</sup>, Huan-Cheng Hu<sup>a</sup>, Zhan-Yun Zhang<sup>a</sup>, Gang Xiong<sup>a</sup> and Bin Zhao<sup>\*a</sup>

<sup>a</sup> Department of Chemistry, Key Laboratory of Advanced Energy Material Chemistry, MOE, and Collaborative Innovation Center of Chemical Science and Engineering (Tianjin), Nankai University, Tianjin 300071, P. R. China

<sup>b</sup> School of Chemistry and Chemical Engineering, Linyi University, Linyi 276005, P. R. China

## **Experimental Section**

### **(1) Synthesis of $1 \cdot \text{NO}_3^-$ and $2 \cdot \text{NO}_3^-$ .**

A mixture of H<sub>2</sub>L (0.0488 g, 0.2 mmol), Zn(NO<sub>3</sub>)<sub>2</sub>·6H<sub>2</sub>O (0.0148 g, 0.05 mmol), 0.1 mmol Ln(NO<sub>3</sub>)<sub>3</sub>·6H<sub>2</sub>O (0.0446 g, Eu(NO<sub>3</sub>)<sub>3</sub>·6H<sub>2</sub>O; 0.0453 g, Tb(NO<sub>3</sub>)<sub>3</sub>·6H<sub>2</sub>O), 4 mL distilled water and 4 mL anhydrous alcohol were sealed in a Teflon-lined stainless vessel (25 mL) and heated at 160 °C for 48 h under autogenous pressure. The vessel was then cooled slowly down to the room temperature at 5 °C/h. Colorless needlelike crystals were obtained. The yield was 72% for  $1 \cdot \text{NO}_3^-$  and 83 % for  $2 \cdot \text{NO}_3^-$  (based on Ln(NO<sub>3</sub>)<sub>3</sub>·6H<sub>2</sub>O). Elemental anal (%): Calcd: C, 28.41; H, 3.31; N: 7.36 Found: C, 28.64; H, 3.45; N: 7.05 for  $2 \cdot \text{NO}_3^-$ ; Calcd: C, 28.67; H, 3.34; N: 7.43 Found: C, 28.39; H, 3.09; N: 7.75 for  $1 \cdot \text{NO}_3^-$ . CCDC Number: 969413 for  $1 \cdot \text{NO}_3^-$ , 969414 for  $2 \cdot \text{NO}_3^-$ .

### **(2) Preparation of $1 \cdot \text{I}^-$ , $2 \cdot \text{I}^-$ and $2 \cdot \text{Br}^-$**

Single crystals of  $\mathbf{1}\cdot\mathbf{I}^-$ ,  $\mathbf{2}\cdot\mathbf{I}^-$  and  $\mathbf{2}\cdot\mathbf{Br}^-$  were obtained from single-crystal to single-crystal transformation when 50 mg single crystals of  $\mathbf{1}\cdot\mathbf{NO}_3^-$  or  $\mathbf{2}\cdot\mathbf{NO}_3^-$  were immersed in a 5 mL solution of 5 equiv KI (KBr) for 12 h, respectively. CCDC Number: 986347 for  $\mathbf{2}\cdot\mathbf{Br}^-$ , 986348 for  $\mathbf{2}\cdot\mathbf{I}^-$ .

### (3) Luminescence response to different common anions

50 mg  $\mathbf{1}\cdot\mathbf{NO}_3^-$  or  $\mathbf{2}\cdot\mathbf{NO}_3^-$  was placed into 50 mL distilled  $\text{H}_2\text{O}$  and ultrasonic agitated for 30 min, resulting in the aqueous suspension. Then 50  $\mu\text{L}$  of  $1\times 10^{-3} \text{ mol}\cdot\text{L}^{-1}$  common inorganic salt aqueous solution of  $\text{NaN}_3$  or  $\text{K}_m\text{X}$  solution ( $m = 1$ ,  $\text{X} = \text{F}, \text{Cl}, \text{Br}, \text{I}, \text{CH}_3\text{COO}, \text{NO}_3, \text{H}_2\text{PO}_4, \text{HSO}_3, \text{HCO}_3, \text{SCN}^-$ ;  $m = 2$ ,  $\text{X} = \text{CO}_3, \text{SO}_4, \text{SO}_3$ ;  $m = 3$ ,  $\text{X} = \text{PO}_4$ ) was respectively added to 950  $\mu\text{L}$  suspension prepared above. After 10 s, the luminescence of the solution was measured respectively.

### (4) Selectively to detect $\text{I}^-$

13 common inorganic salt aqueous solution of  $\text{K}_m\text{X}$  with the concentration of  $1\times 10^{-3} \text{ mol}\cdot\text{L}^{-1}$  ( $m = 1$ ,  $\text{X} = \text{F}, \text{Cl}, \text{CH}_3\text{COO}, \text{NO}_3, \text{H}_2\text{PO}_4, \text{HSO}_3, \text{HCO}_3$ ;  $m = 2$ ,  $\text{X} = \text{CO}_3, \text{SO}_4, \text{SO}_3$ ;  $m = 3$ ,  $\text{X} = \text{PO}_4$ ) were prepared, and each kind of solution was taken out 10  $\mu\text{L}$  and added together to the 870  $\mu\text{L}$  aqueous suspensions of  $\mathbf{1}\cdot\mathbf{NO}_3^-$  or  $\mathbf{2}\cdot\mathbf{NO}_3^-$  to form  $\mathbf{1}\cdot\mathbf{X}$  and  $\mathbf{2}\cdot\mathbf{X}$ , respectively. After 10 s, the luminescence of the mixed solution  $\mathbf{1}\cdot\mathbf{X}$  and  $\mathbf{2}\cdot\mathbf{X}$  were measured. Then, 10  $\mu\text{L}$   $1\times 10^{-3} \text{ mol}\cdot\text{L}^{-1}$  KI was respectively added to the mixed solution  $\mathbf{1}\cdot\mathbf{X}$  or  $\mathbf{2}\cdot\mathbf{X}$ . After 10 s, the luminescence was measured respectively.

### (5) Luminescence response to $\text{I}^-$ with different concentrations

$5 \times 10^{-7} \sim 1 \times 10^{-3} \text{ mol} \cdot \text{L}^{-1}$  KI was respectively added to the aqueous suspension of  $1 \cdot \text{NO}_3^-$ . Then, the luminescence was measured respectively;  $1 \times 10^{-8} \sim 1 \times 10^{-4} \text{ mol} \cdot \text{L}^{-1}$  KI was respectively added to the aqueous suspension of  $2 \cdot \text{NO}_3^-$ . Then, the luminescence was measured, respectively.

#### (6) Regeneration of $2 \cdot \text{NO}_3^-$

$2 \cdot \text{I}^-$  was immersed in  $\text{KNO}_3$  (with the  $\text{KNO}_3/2 \cdot \text{I}^-$  molar ratio of 10/1) aqueous solution for 3 h respectively. Then, the samples were washed by distilled  $\text{H}_2\text{O}$  for several times and collected.

#### (7) Anion exchange with $\text{I}^-$

50 mg sample of  $1 \cdot \text{NO}_3^-$  or  $2 \cdot \text{NO}_3^-$  was immersed in a 5 mL solution of 5 equiv KI. Every ten minutes, the solution was centrifuged, separated from the solid sample and monitored by UV spectrophotometer respectively. After each test, the solution was poured back into the beaker for further anion exchange.

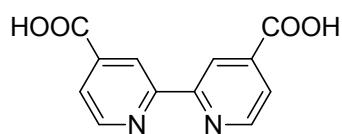

**Scheme S1.** The structure of  $\text{H}_2\text{L}$ .

## Instrumental Details

Elemental analyses for C, H, and N were obtained at the Institute of Elemental Organic Chemistry, Nankai University. Thermogravimetric analyses (TGA)

experiments were performed on a NETZSCH TG 209 instrument with a heating rate of  $10^{\circ}\text{Cmin}^{-1}$ . Powder X-ray diffraction measurements were recorded on a D/Max-2500 X-ray diffractometer using  $\text{Cu-K}\alpha$  radiation. Energy Dispersive Spectrometer (EDS) tests were measured on field emission scanning electron microscopy (SEM, JEOLJSM7500F). UV-Vis spectroscopic studies were collected on a HITACHI U-3900 and JASCO V-570 spectrophotometer. X-ray photoelectron spectroscopy (XPS) tests were performed on Kratos Axis Ultra DLD multi-technique. Raman spectrum was measured on Bruker RFS100/S. The Luminescent spectra were measured on a HITACHI F-4600 FL spectrophotometer.

### **X-ray Crystallography**

Crystallographic data of  $\mathbf{1}\cdot\text{NO}_3^-$ ,  $\mathbf{2}\cdot\text{NO}_3^-$  and  $\mathbf{2}\cdot\text{I}^-$  were collected on a SuperNova Single Crystal Diffractometer equipped with graphite-monochromatic  $\text{MoK}\alpha$  radiation ( $\lambda = 0.71073 \text{ \AA}$ ). The data integration and empirical absorption corrections were carried out by SAINT programs. The structures are solved by direct methods (SHELXS 97). All the non-hydrogen atoms are refined anisotropically on  $F^2$  by full-matrix least-squares techniques (SHELXL 97). All the hydrogen atoms except for those of the uncoordinated water molecules in these coordination polymers are generated geometrically and refined isotropically using the riding model. Additionally,  $\text{NO}_3^-$  in  $\mathbf{1}\cdot\text{NO}_3^-$  and  $\mathbf{2}\cdot\text{NO}_3^-$  are disordered, which are refined with a disordered model and some N-O bonds are restrained.

## Crystal structures of $2 \cdot \text{I}^-$

Crystallographic details of it are summarized in Table S1. As shown in Fig. S1, the cationic frameworks of  $2 \cdot \text{I}^-$  still remain the same as that in  $2 \cdot \text{NO}_3^-$ . Interestingly,  $\text{I}^-$  ions exchange with  $\text{NO}_3^-$ , and  $\text{I}_3^-$  reside in the channels of  $2 \cdot \text{I}^-$  with typical I-I bonds 3.04 and 2.58 Å, which fall into the normal range of I-I bond lengths<sup>1</sup>.

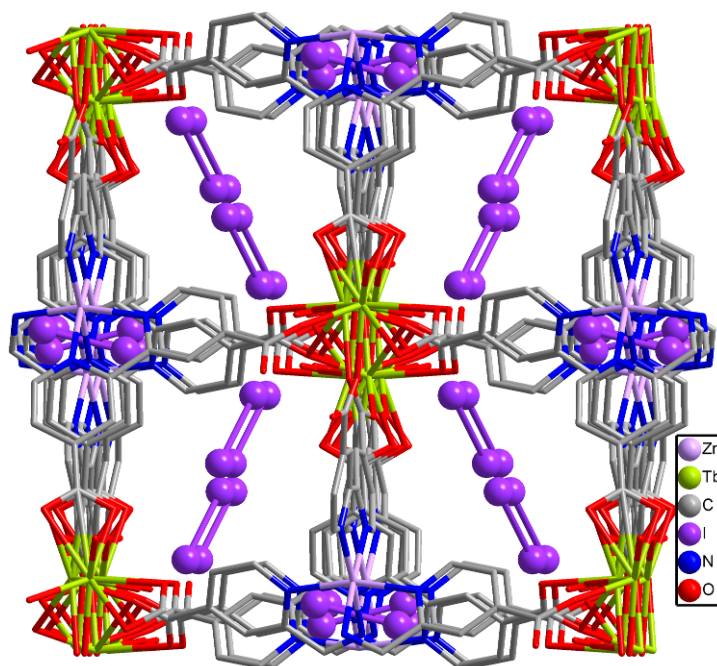

Fig. S1 The 3D framework of  $2 \cdot \text{I}^-$ .

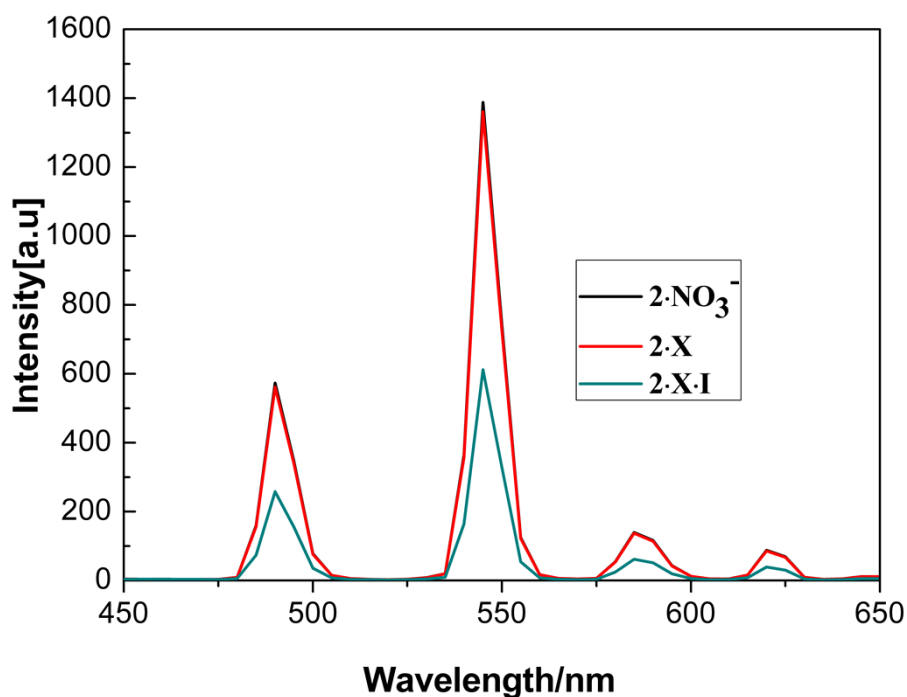

**Fig. S2** The liquid PL spectra of  $2\cdot\text{NO}_3^-$ ,  $2\cdot\text{X}$  and  $2\cdot\text{X}\cdot\text{I}^-$  (excited at 343 nm).

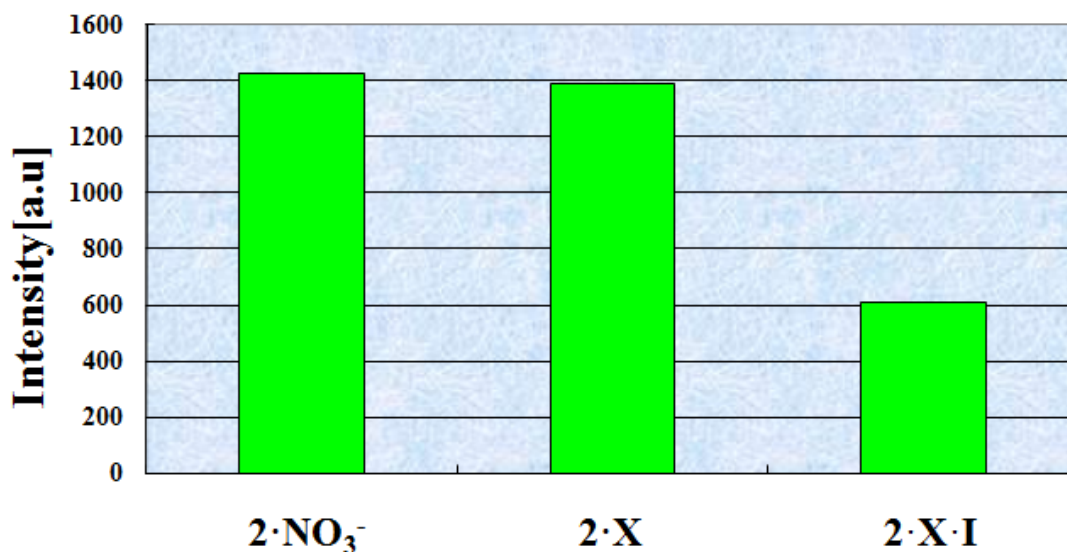

**Fig. S3**  $^5\text{D}_4 \rightarrow ^7\text{F}_5$  transition intensities of  $2\cdot\text{NO}_3^-$ ,  $2\cdot\text{X}$  and  $2\cdot\text{X}\cdot\text{I}^-$  (excited at 343 nm and monitored at 545 nm).

The detection limit was calculated based on the luminescence intensity change vs  $\log C$  curve of  $\text{I}^-$  ( $1 \times 10^{-8} \sim 1 \times 10^{-4} \text{ mol}\cdot\text{L}^{-1}$ ), shown in Fig. S5. The luminescence intensity of  $\text{I}^-$  was measured by three times and the standard deviation of blank measurement was achieved. The detection limit was calculated with the following equation: Detection limit =  $3\sigma/k$ , where  $\sigma$  is the standard deviation of blank measurement,  $k$  is the slope between the luminescence intensity versus  $\log C_1$ .

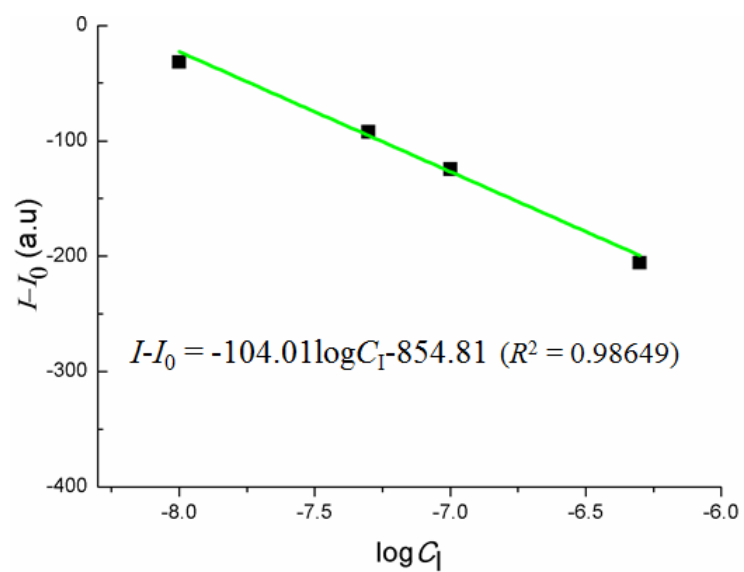

**Fig. S4** The fitting of luminescence intensity change ( $I-I_0$ ) of  $2\cdot\text{NO}_3^-$  vs  $\log C_I$ .

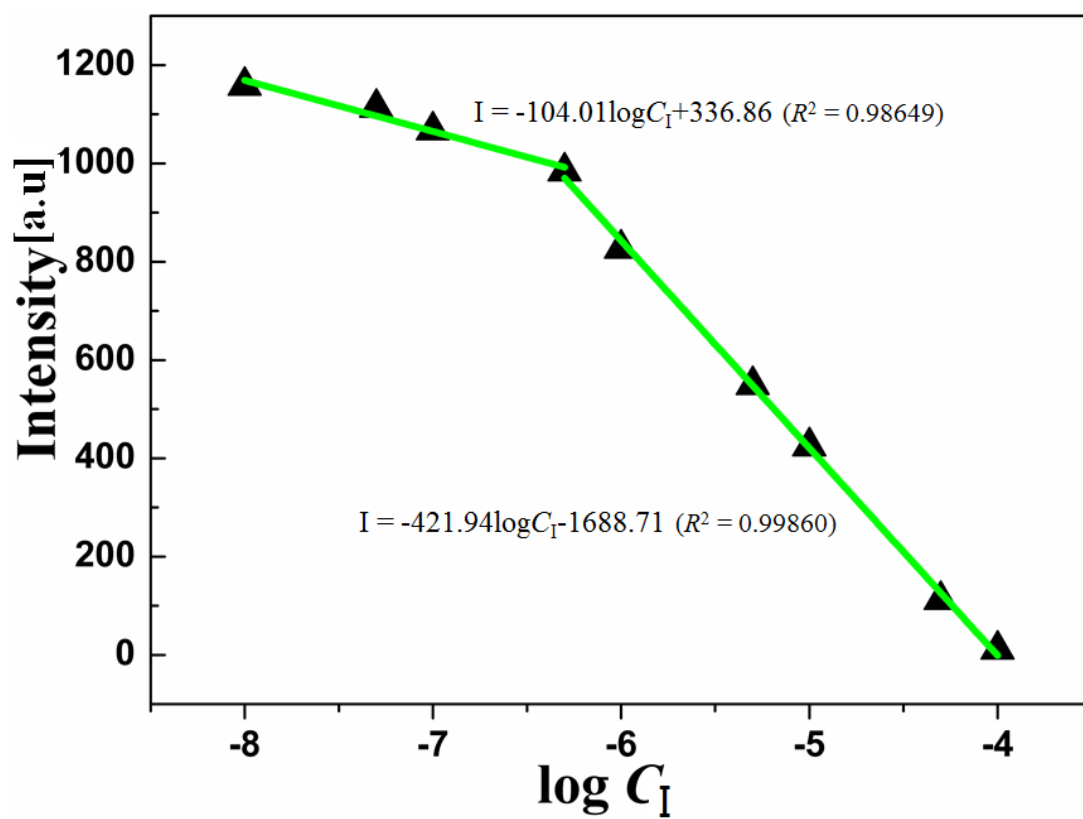

**Fig. S5** The intensity plots of  $2\cdot\text{NO}_3^-$  vs  $\log C_I$

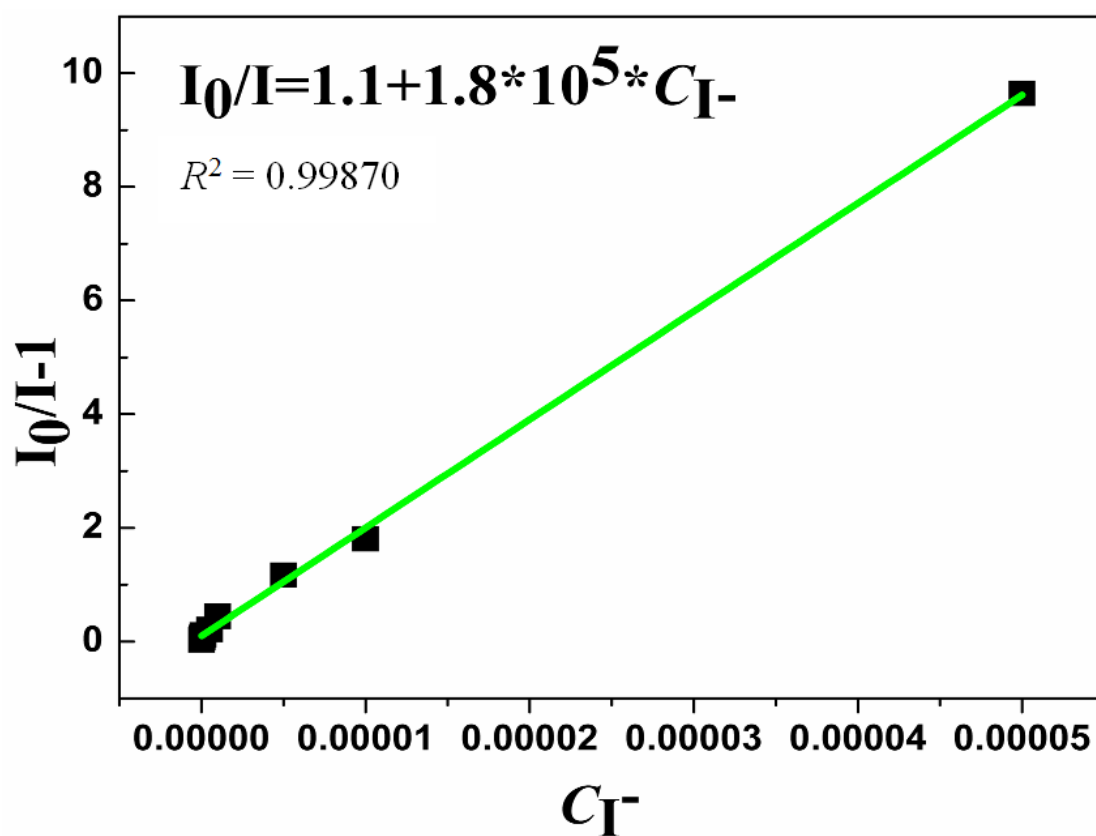

Fig. S6 The Stern-Volmer plot of  $2 \cdot \text{NO}_3^-$  was quenched by KI aqueous solution.

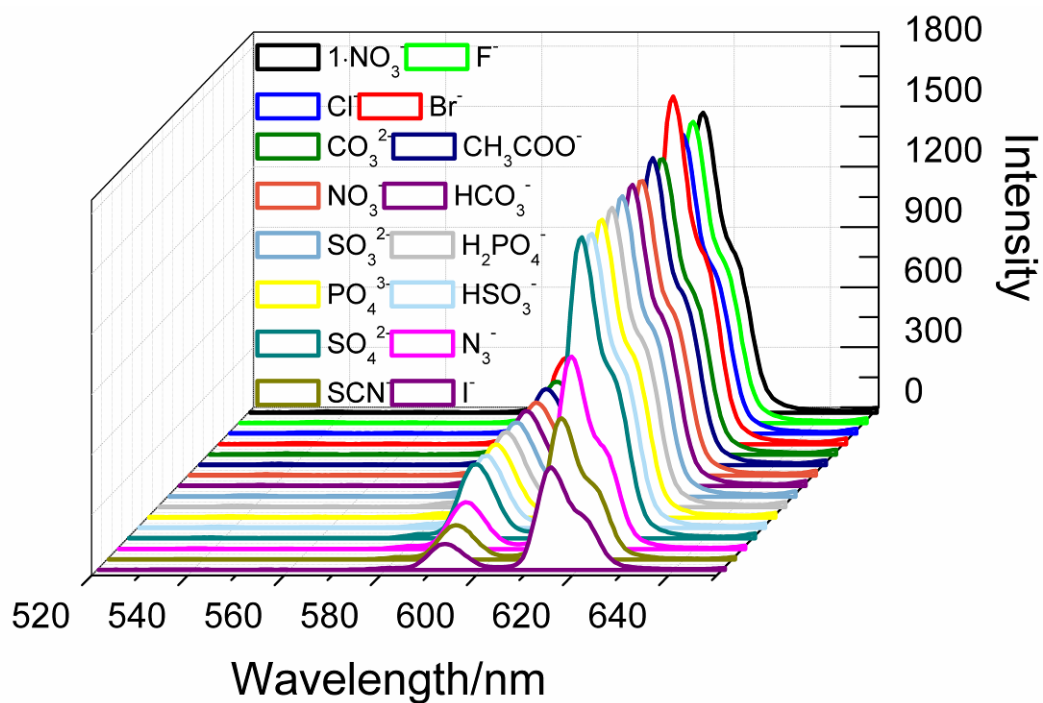

Fig. S7 PL spectra of  $1 \cdot \text{NO}_3^-$  after immersed in various anions aqueous solutions (excited at 343 nm).

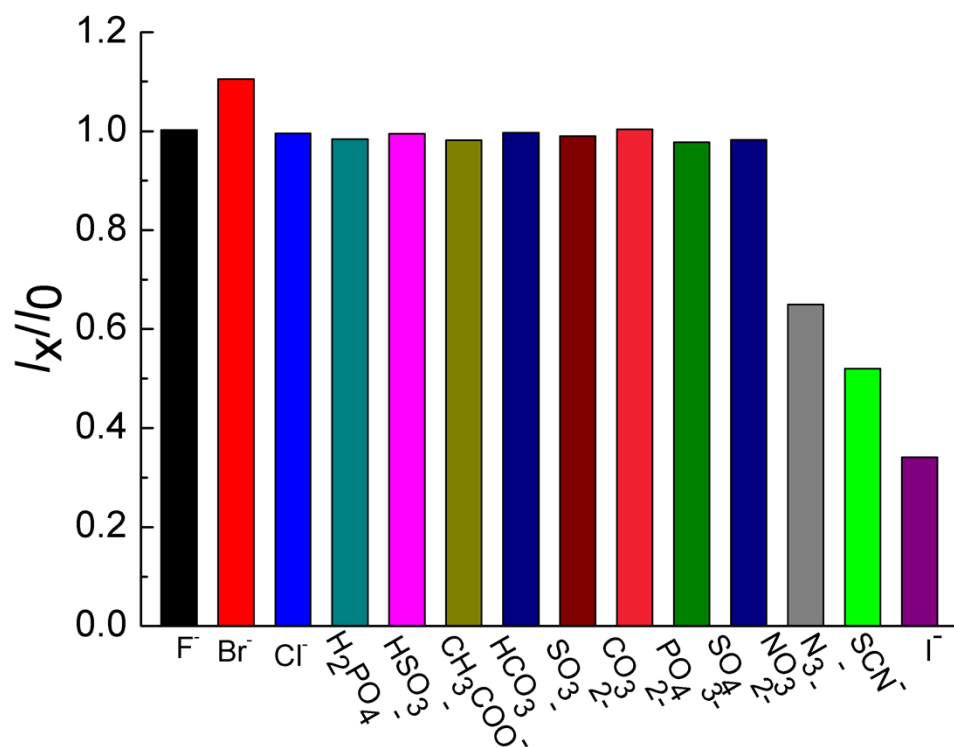

**Fig. S8** The ratio of  $^5D_0 \rightarrow ^7F_2$  transition intensities of  $1 \cdot \text{NO}_3^-$  immersed in various  $5 \times 10^{-5}$  mmol  $\text{K}_m\text{X}$  aqueous solutions ( $I_x$ ) to the  $1 \cdot \text{NO}_3^-$  immersed in distilled water ( $I_0$ ) (excited at 343 nm and monitored at 615 nm).

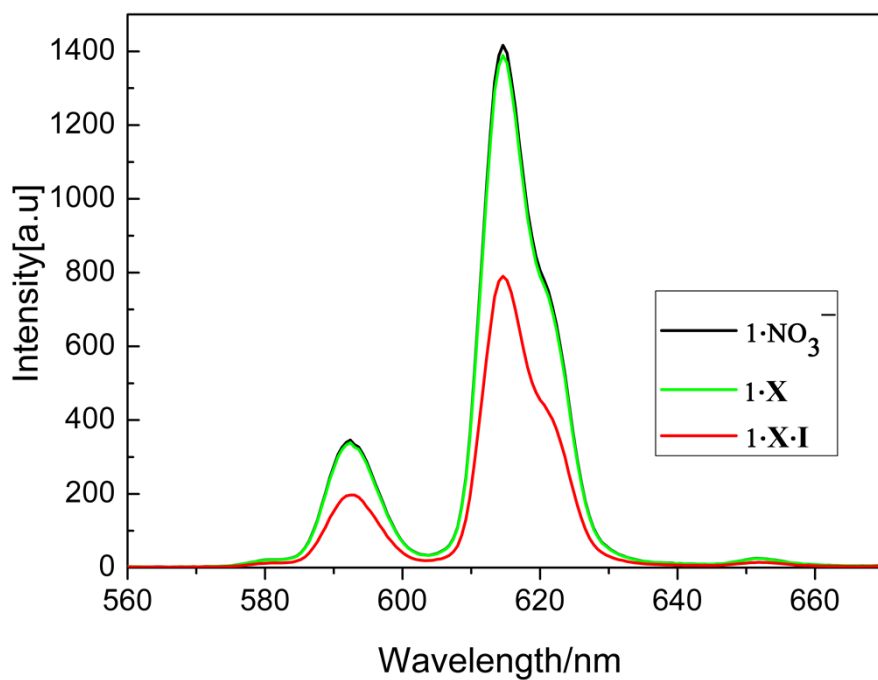

**Fig. S9** The liquid PL spectra of  $1 \cdot \text{NO}_3^-$ ,  $1 \cdot \text{X}$ , and  $1 \cdot \text{X} \cdot \text{I}^-$  (excited at 343 nm).

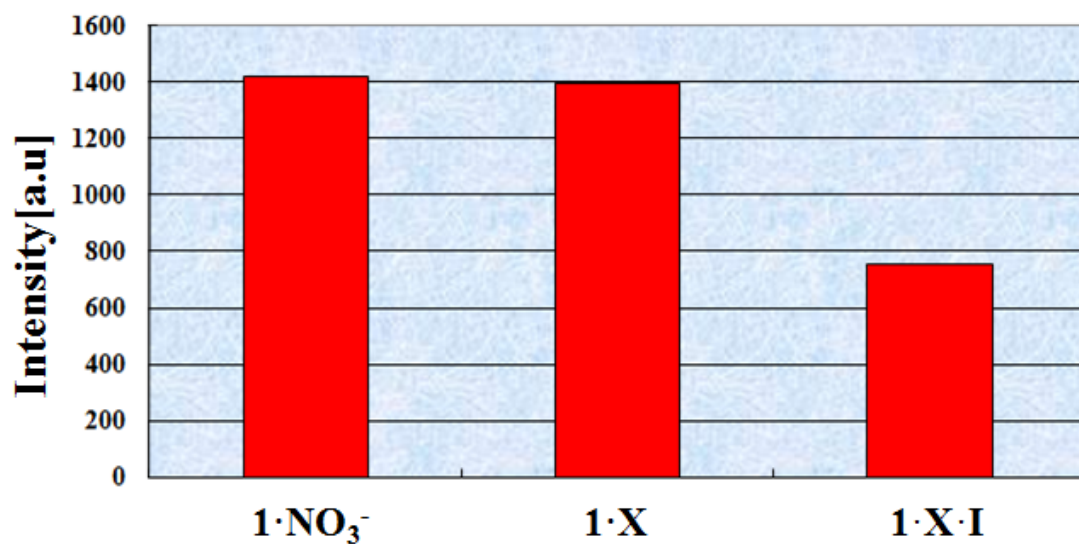

Fig. S10  $^5\text{D}_0 \rightarrow ^7\text{F}_2$  transition intensities of  $1\cdot\text{NO}_3^-$ ,  $1\cdot\text{X}$  and  $1\cdot\text{X}\cdot\text{I}^-$  (excited at 343 nm and monitored at 615 nm).

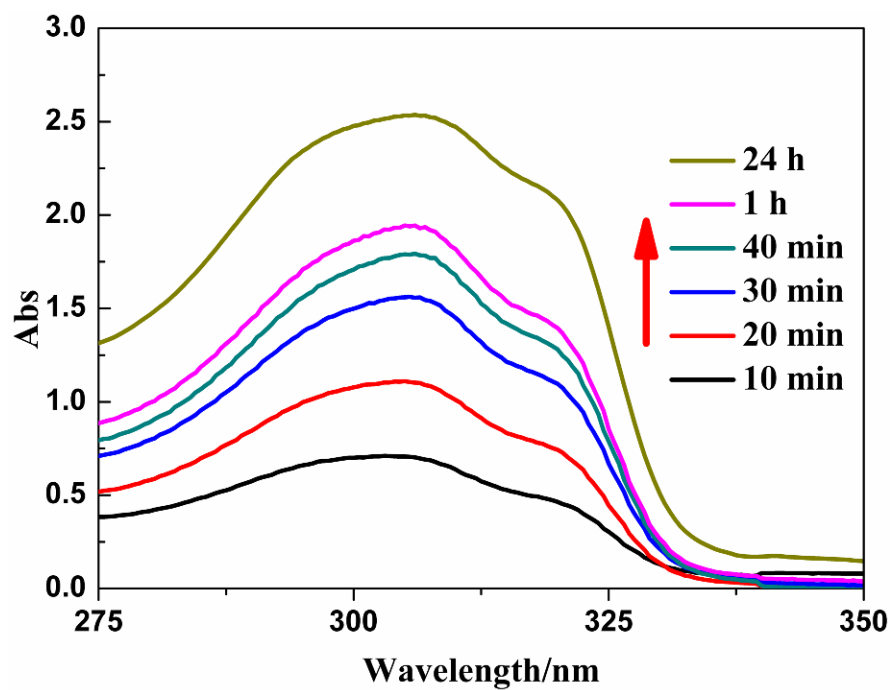

Fig. S11 UV spectra of the KI solution after  $1\cdot\text{NO}_3^-$  was added.

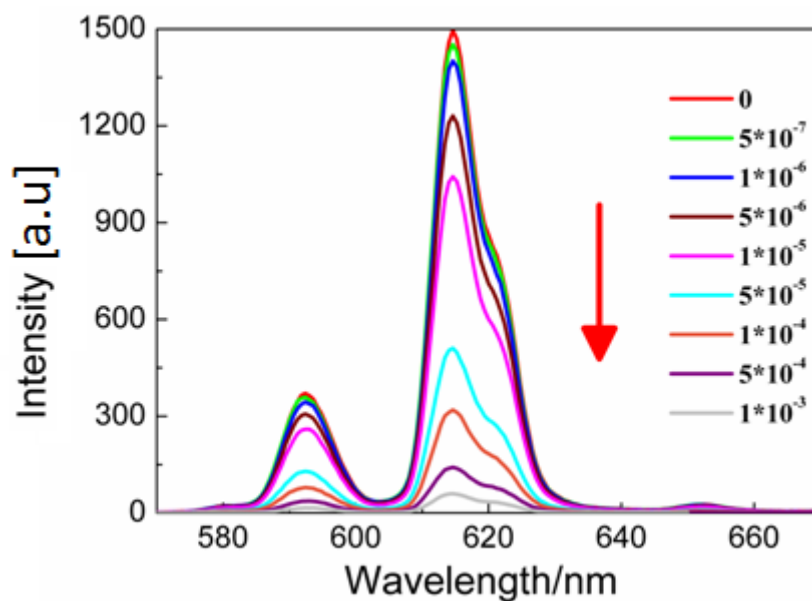

**Fig. S12** The liquid PL spectra of  $1 \cdot \text{NO}_3^-$  under different concentrations of KI aqueous solution (mol/L) upon excited at 343 nm.

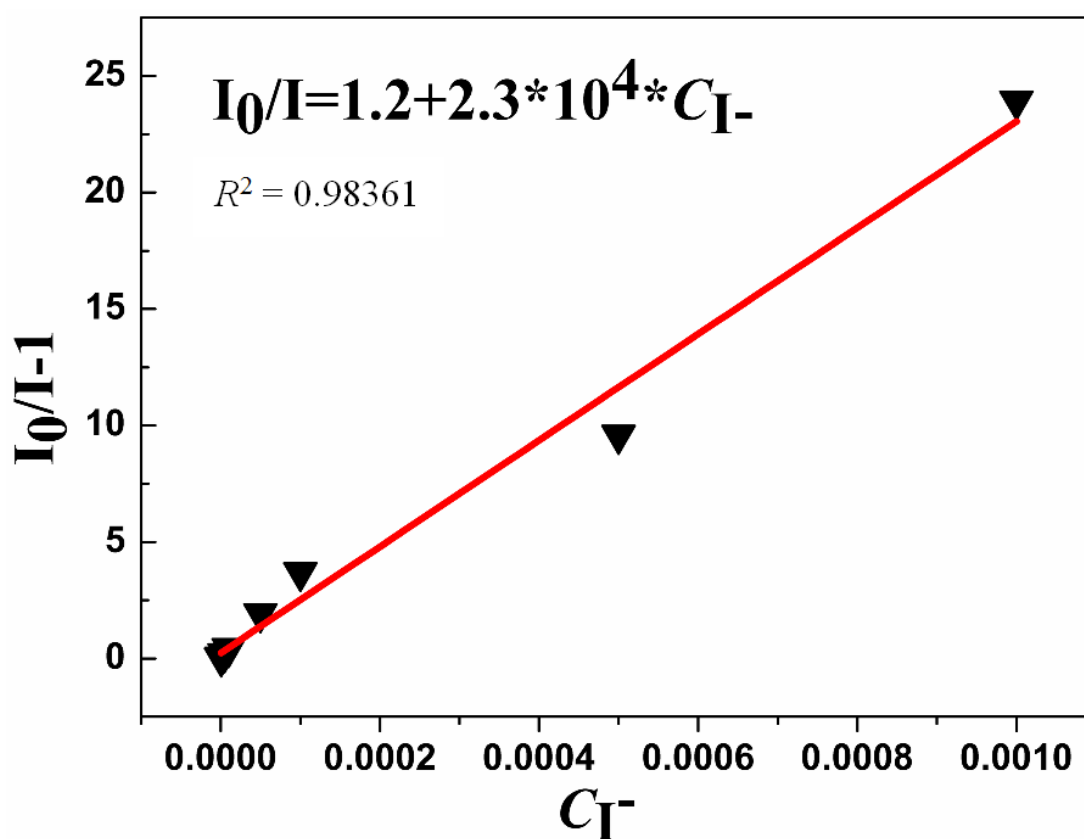

**Fig. S13** Stern-Volmer plot of  $1 \cdot \text{NO}_3^-$  was quenched by KI aqueous solution.

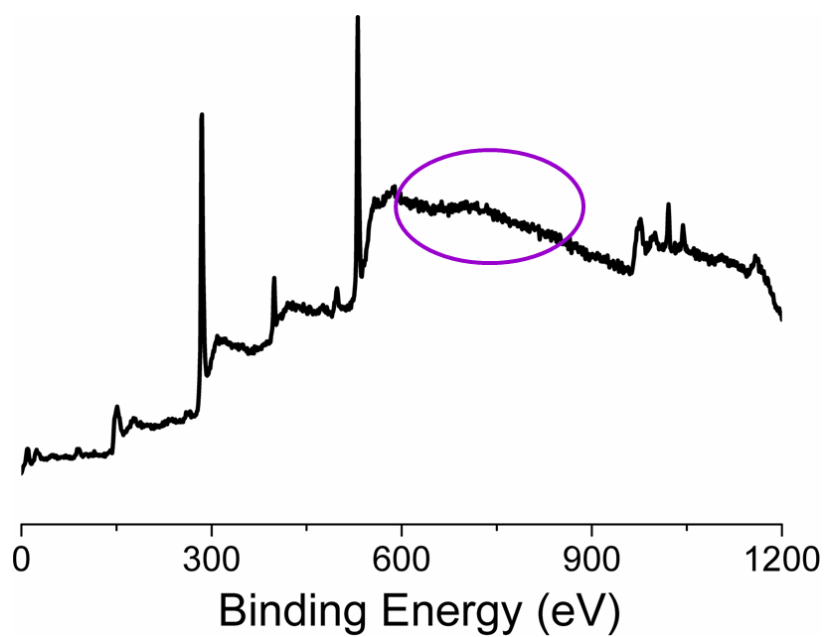

**Fig. S14** The XPS spectrum of regenerated  $2\cdot\text{NO}_3^-$  from  $2\cdot\text{I}^-$ .

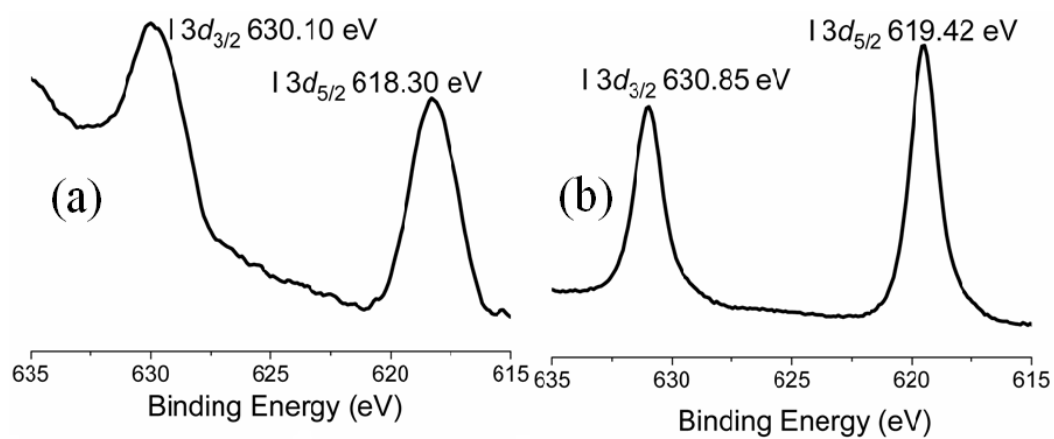

**Fig. S15** The XPS spectra of  $2\cdot\text{I}^-$  (a) and AgI (b).

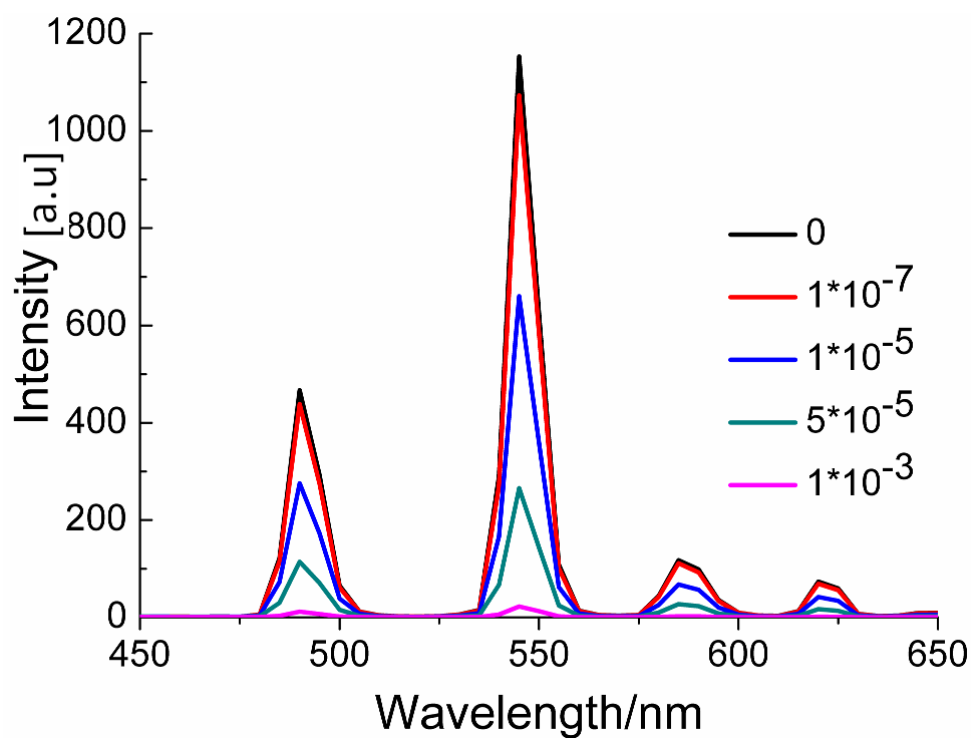

**Fig. S16** PL spectra of the regenerated  $2\cdot\text{NO}_3^-$  from the  $2\cdot\text{I}^-$  after 10 cycles under different concentrations of KI aqueous solution (mol/L) upon excited at 343 nm.

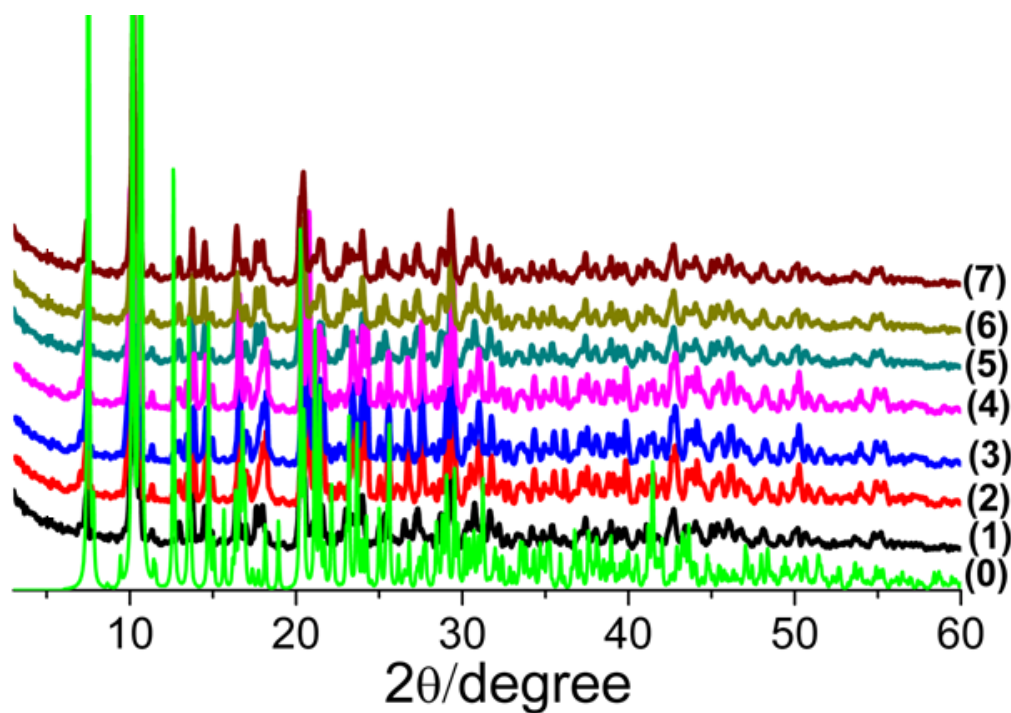

**Fig. S17** PXRD patterns of the simulated (0),  $1\cdot\text{NO}_3^-$  (1),  $2\cdot\text{NO}_3^-$  (2),  $2\cdot\text{I}^-$  (3),  $1\cdot\text{I}^-$  (4), regenerated  $2\cdot\text{NO}_3^-$  from  $2\cdot\text{I}^-$  (5),  $1\cdot\text{NO}_3^-$  (6) and  $2\cdot\text{NO}_3^-$  (7) immersed in aqueous for two weeks.

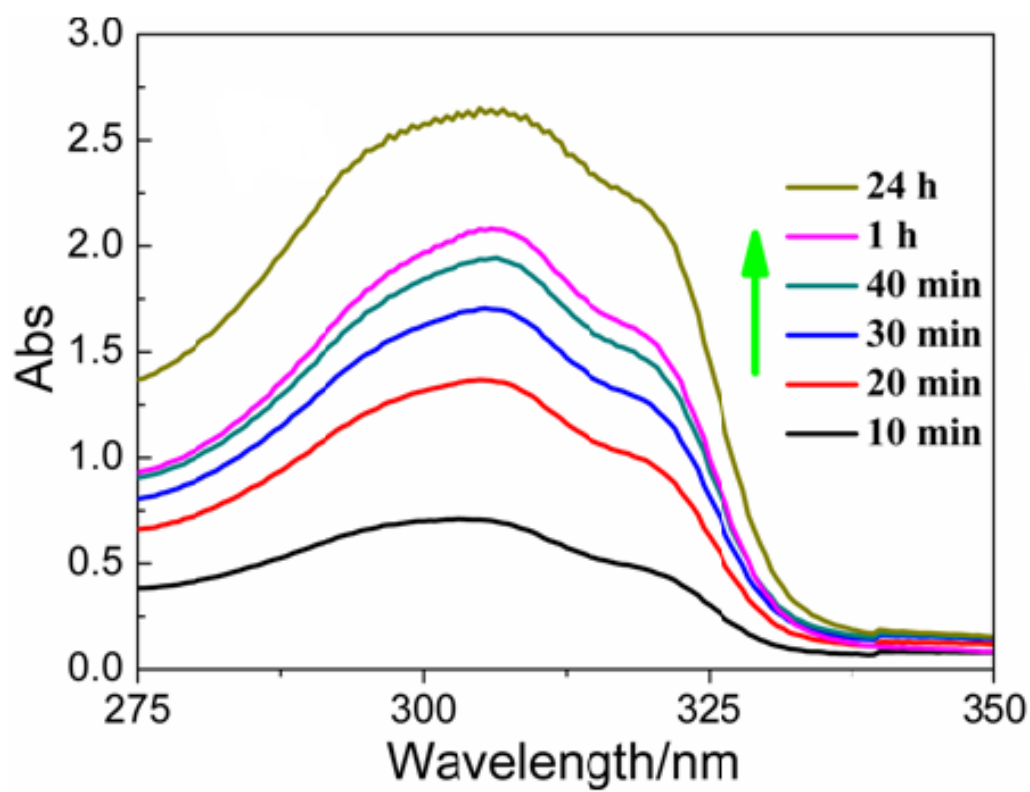

**Fig. S18** UV spectra of the KI solution after  $2 \cdot \text{NO}_3^-$  was added.

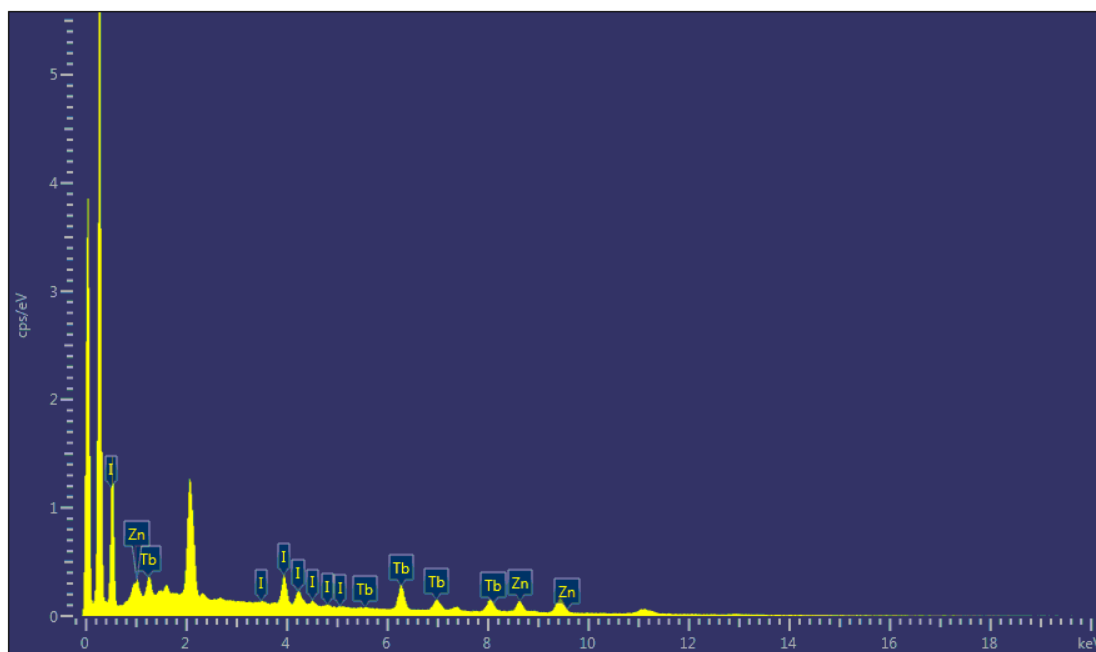

**Fig. S19** The EDS mapping of  $2 \cdot \text{I}^-$ .

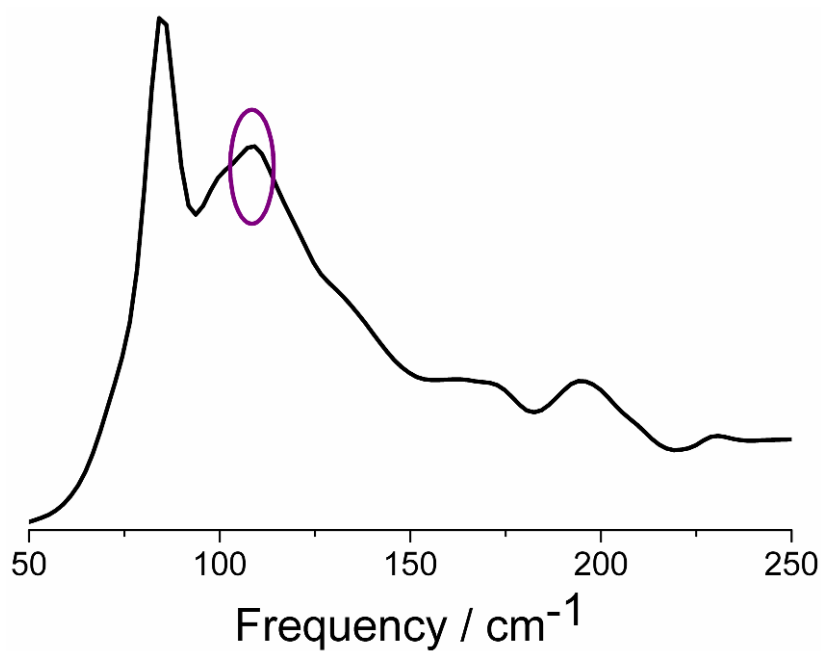

Fig. S20 The Raman spectrum of  $2 \cdot \text{I}^-$ .

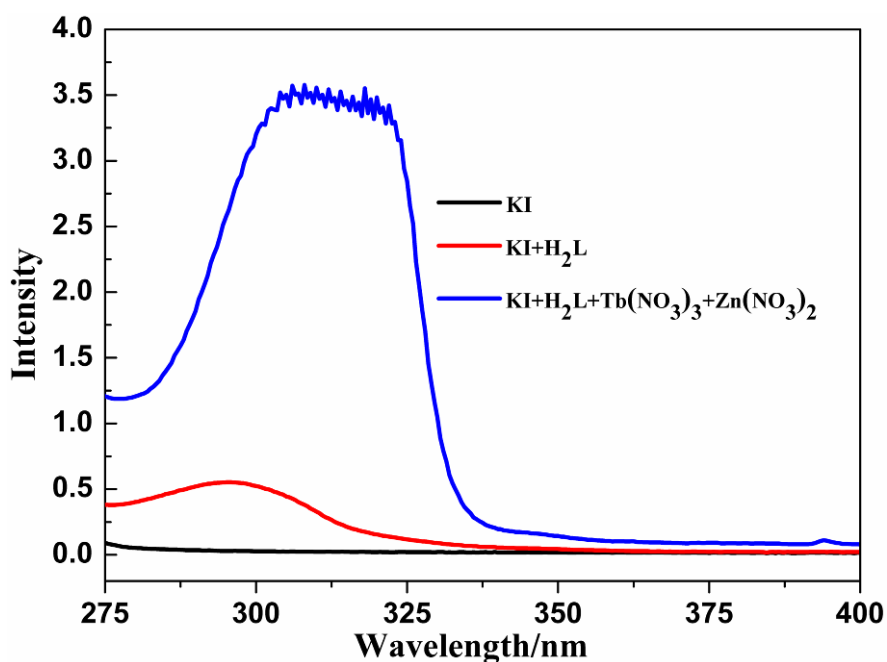

Fig. S21 UV spectra of the solutions: KI, KI+H<sub>2</sub>L and KI+H<sub>2</sub>L+Tb(NO<sub>3</sub>)<sub>3</sub>+Zn(NO<sub>3</sub>)<sub>2</sub>.

The formation of  $\text{I}_2$  was further studied in mionectic environment.  $2 \cdot \text{NO}_3^-$  solid samples and KI solution were placed in vacuum tube with inletting Ar gas respectively, and the gas suction and exhaust were proceeding for 20 minutes. Then, KI solution was introduced into the vacuum tube contained the  $2 \cdot \text{NO}_3^-$  samples by steel needle. After three minutes, weak color change of the solid sample took place from colorless to pale yellow. Simultaneously, the same experiments were carried out,

but in air. Amazingly, the color change from colorless to yellow is very fast within only 1 minute (Fig. S20). Thus, the oxidization of  $I^-$  in  $2\cdot NO_3^-$  in air is quicker than that in mionectic environment. The results indicate that, just as what you expected, the oxidization of  $I^-$  in  $2\cdot NO_3^-$  is relevant to the amount of  $O_2$ .

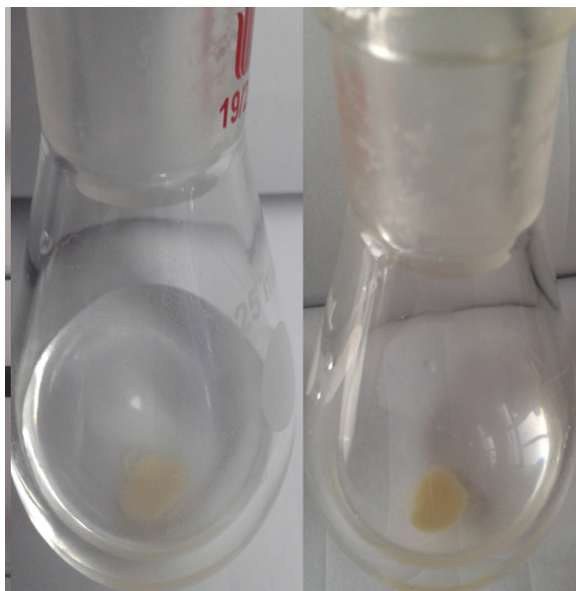

**Fig. S22** The  $2\cdot NO_3^-$  and KI solution in mionectic enviroment (left) and in air (right).

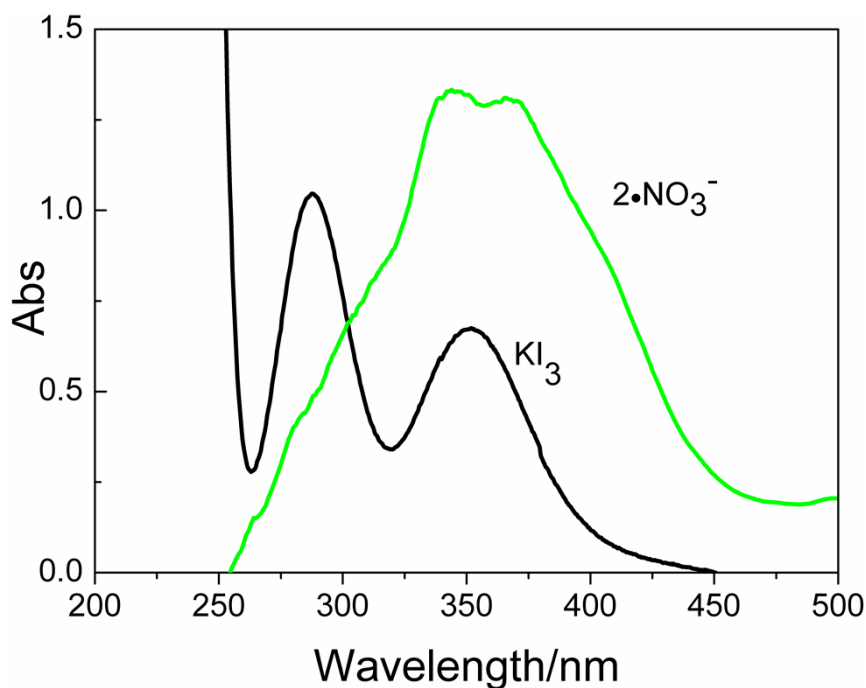

**Fig. S23** UV spectra of the  $KI_3$  solution (black line) and the solid samples of  $2\cdot NO_3^-$  (green line).

Single crystal structure analyse of the crystal  $2\cdot Br^-$  ( $2\cdot NO_3^-$  after immersed in KBr ) also indicates  $Br^-$  exchanged with  $NO_3^-$  and entered into the channels, although the

crystal data is not perfect. Br<sup>-</sup> in the channels and the coordinated water molecules on the Tb or Eu atoms form strong H-bonding with the Br-O distance of 2.74 Å and bond angle Br-H-O of 164.36°. The formation of H-bonding decreases the energy consumption from the O-H vibrations, and indirectly increases the energy transfer from ligand L<sup>2-</sup> to Eu/Tb center, resulting in luminescence enhancement (Fig. S23). Furthermore, the heavy atom effect of Br<sup>-</sup> can enhance the intersystem crossing efficiency from *S*1 to *T*1, (*S*1 and *T*1 represent the excited state and the triplet state, respectively, Fig. S24)<sup>10</sup>, and result in the luminescence enhancement. Neither SCN<sup>-</sup> nor N<sub>3</sub><sup>-</sup> has absorption peaks from 240 to 375 nm in the UV-Vis spectra (Fig. 25, 26), and both of them can weaken the luminescence of **1**·NO<sub>3</sub><sup>-</sup> and **2**·NO<sub>3</sub><sup>-</sup>. We also attempt to further explore the mechanism of luminescence response to SCN<sup>-</sup> and N<sub>3</sub><sup>-</sup>, but the positions of them in channels did not be determined by single-crystal diffraction technology.

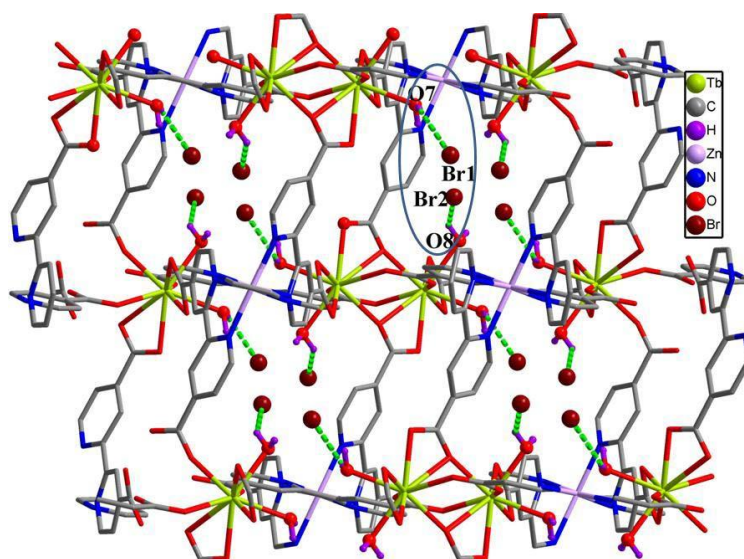

**Fig. S24** The H-Bonding (green line) between Br<sup>-</sup> and coordination water molecules in crystal **2**·NO<sub>3</sub><sup>-</sup> after immersed in KBr.

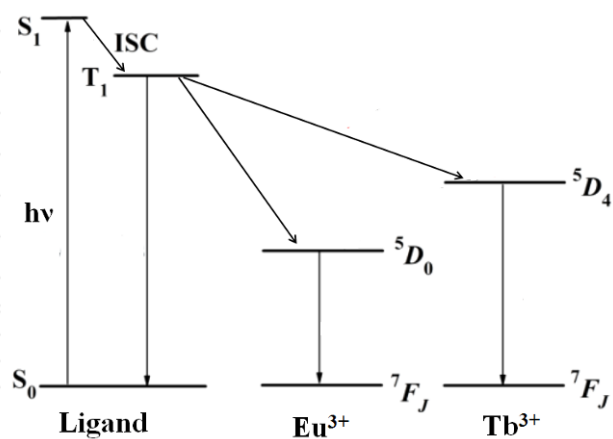

**Fig. S25** The energy absorption and emission process in  $1 \cdot \text{NO}_3^-$  and  $2 \cdot \text{NO}_3^-$ .

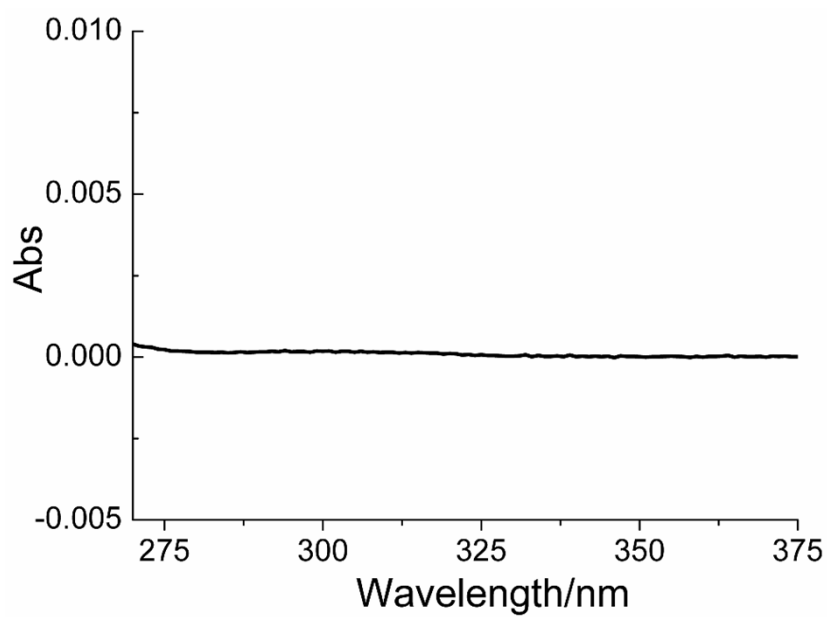

**Fig. S26** UV-Vis spectrum of the  $\text{NaN}_3$  solution.

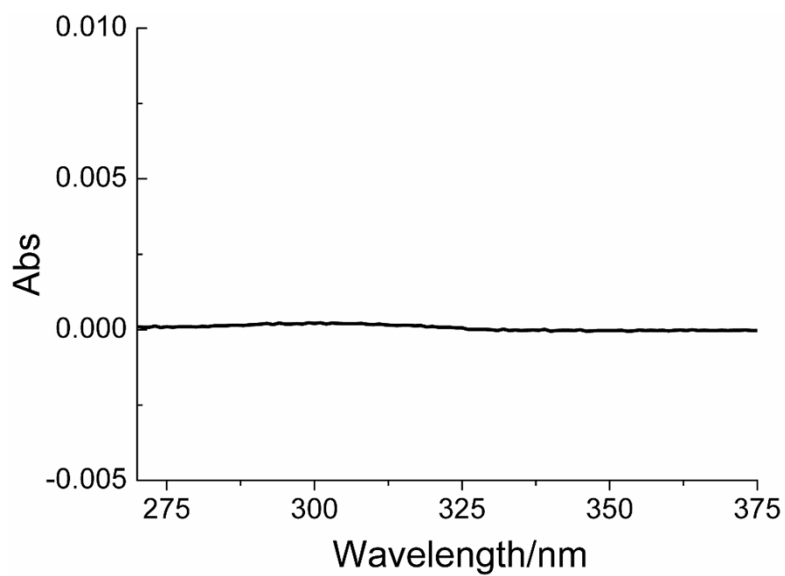

**Fig. S27** UV-Vis spectra of the  $\text{KSCN}$  solution.

## Thermogravimetric Analysis (TGA)

The TGA curves of  $1 \cdot \text{NO}_3^-$  and  $2 \cdot \text{NO}_3^-$  exhibit two steps of weight loss. The first weight loss of 19.31 % for  $1 \cdot \text{NO}_3^-$  and 18.46 % for  $2 \cdot \text{NO}_3^-$  in the range of 25 °C and 100 °C arise from the loss of free water molecules and coordinated water molecules, which is well consistent with the calculated 19.10 % for  $1 \cdot \text{NO}_3^-$  and 18.92 % for  $2 \cdot \text{NO}_3^-$ . During the range of 100-360 °C, both of them mainly stay in a plateau, indicating high thermal stability for these two MOFs. The second weight loss above 360 °C stems from the decomposition of 3D frameworks.

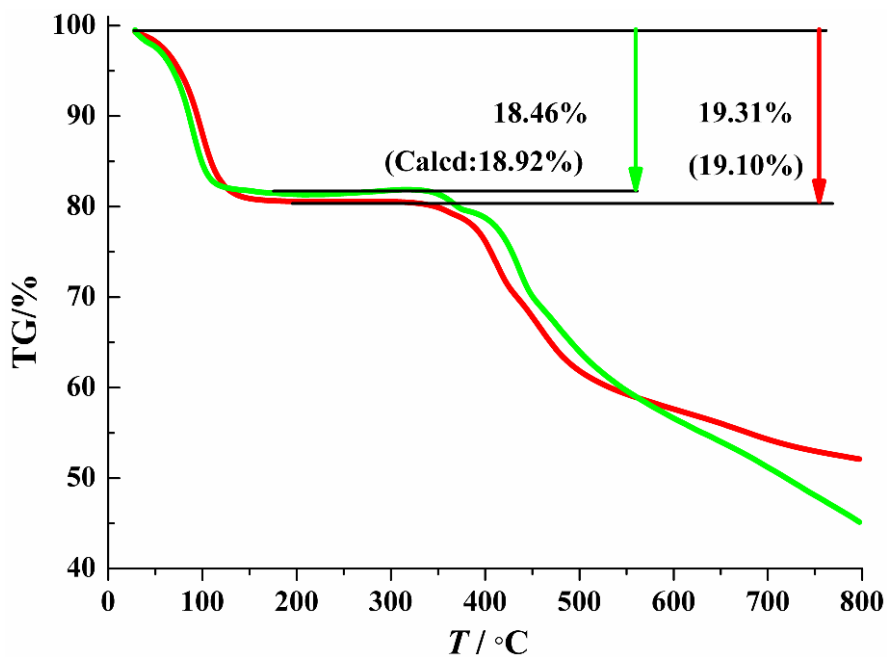

Fig. S28 The TGA curves of  $1 \cdot \text{NO}_3^-$  (red line) and  $2 \cdot \text{NO}_3^-$  (green line).

**Table S1. Response time and lowest detection limit in some MOFs as luminescent Probes**

| MOF                                 | Detected object               | Response time | Detection limits (mol/L) | [Ref]        |
|-------------------------------------|-------------------------------|---------------|--------------------------|--------------|
| Eu-MOF                              | Fe <sup>3+</sup>              | 1 min         | 1×10 <sup>-4</sup>       | 2            |
| Eu-MOF                              | Cu <sup>2+</sup>              | --            | 1×10 <sup>-5</sup>       | 3            |
| Tb-MOF                              | PO <sub>4</sub> <sup>3-</sup> | --            | 1×10 <sup>-4</sup>       | 4            |
| Eu-MOF                              | Fe <sup>3+</sup>              | 4 h           | 1×10 <sup>-4</sup>       | 5            |
| Zn-MOF                              | Cu <sup>2+</sup>              | --            | 1×10 <sup>-3</sup>       | 6            |
| Eu-MOF                              | DMF                           | 10~20 s       | --                       | 7            |
| Zn-MOF                              | Explosives                    | 10 s          | --                       | 8            |
| Ir-MOF                              | O <sub>2</sub>                | 30 s          | --                       | 9            |
| <b>2·NO<sub>3</sub><sup>-</sup></b> | I <sup>-</sup>                | 10 s          | 1×10 <sup>-8</sup>       | in this work |
| <b>1·NO<sub>3</sub><sup>-</sup></b> | I <sup>-</sup>                | 10 s          | 5×10 <sup>-7</sup>       | in this work |

**Table S2. Crystal data and structure refinement for 1·NO<sub>3</sub><sup>-</sup>, 2·NO<sub>3</sub><sup>-</sup>, 2·Br<sup>-</sup> and 2·I<sup>-</sup>**

| Complex           | <b>1·NO<sub>3</sub><sup>-</sup></b>                                               | <b>2·NO<sub>3</sub><sup>-</sup></b>                                               | <b>2·Br<sup>-</sup></b>                                                                                 | <b>2·I<sup>-</sup></b>                                                                                         |
|-------------------|-----------------------------------------------------------------------------------|-----------------------------------------------------------------------------------|---------------------------------------------------------------------------------------------------------|----------------------------------------------------------------------------------------------------------------|
| Formula           | C <sub>36</sub> H <sub>50</sub> Eu <sub>2</sub> N <sub>8</sub> O <sub>34</sub> Zn | C <sub>36</sub> H <sub>50</sub> Tb <sub>2</sub> N <sub>8</sub> O <sub>34</sub> Zn | C <sub>72</sub> H <sub>52</sub> Br <sub>4</sub> N <sub>12</sub> O <sub>62</sub> Tb <sub>4</sub> Zn<br>2 | C <sub>72</sub> H <sub>52</sub> I <sub>4</sub> N <sub>12</sub> O <sub>42</sub> Tb <sub>4</sub> Zn <sub>2</sub> |
| Fw                | 1508.15                                                                           | 1522.07                                                                           | 3163.32                                                                                                 | 3031.28                                                                                                        |
| Crystal system    | Monoclinic                                                                        | Monoclinic                                                                        | Monoclinic                                                                                              | Monoclinic                                                                                                     |
| Space group       | C2/c                                                                              | C2/c                                                                              | C2/c                                                                                                    | C2/c                                                                                                           |
| a, Å              | 17.0712(9)                                                                        | 17.0778(7)                                                                        | 17.0516(9)                                                                                              | 17.2316(6)                                                                                                     |
| b, Å              | 16.9810(11)                                                                       | 16.9284(4)                                                                        | 16.9331(10)                                                                                             | 16.7585(7)                                                                                                     |
| c, Å              | 20.3832(10)                                                                       | 20.3385(9)                                                                        | 20.3267(14)                                                                                             | 21.2567(7)                                                                                                     |
| α, deg            | 90.00                                                                             | 90.00                                                                             | 90.00                                                                                                   | 90.00                                                                                                          |
| β, deg            | 108.073(6)                                                                        | 108.115(5)                                                                        | 107.781(7)                                                                                              | 106.996(4)                                                                                                     |
| γ, deg            | 90.00                                                                             | 90.00                                                                             | 90.00                                                                                                   | 90.00                                                                                                          |
| V, Å <sup>3</sup> | 5617.3(5)                                                                         | 5588.4(4)                                                                         | 5588.7(6)                                                                                               | 5870.3(4)                                                                                                      |

| Z                        | 4             | 4             | 4             | 2             |
|--------------------------|---------------|---------------|---------------|---------------|
| Dc, g/cm <sup>3</sup>    | 1.755         | 1.780         | 1.880         | 1.715         |
| F(000)                   | 2904          | 2920          | 3048          | 2872          |
| $\mu$ , mm <sup>-1</sup> | 2.731         | 3.031         | 4.453         | 3.908         |
| GOF on $F^2$             | 1.048         | 1.053         | 1.052         | 1.034         |
| $R_1/wR_2(I>2\sigma(I))$ | 0.0582/0.1350 | 0.0523/0.1294 | 0.0658/0.1606 | 0.0548/0.1255 |

## References

1. P. H. Svensson and L. Kloo, *Chem. Rev.* 2003, **103**, 1649.
2. M. Zheng, H. Q. Tan, Z. G. Xie, L. G. Zhang, X. B. Jing and Z. C. Sun, *Appl. Mater. Interfaces* 2013, **5**, 1078.
3. B. L. Chen, L. B. Wang, Y. Q. Xiao, F. R. Fronczek, M. Xue, Y. J. Cui and G. D. Qian, *Angew. Chem., Int. Ed.* 2009, **48**, 500.
4. H. Xu, Y. Q. Xiao, X. T. Rao, Z. S. Dou, W. F. Li, Y. J. Cui, Z. Y. Wang and G. D. Qian, *J. Alloys. Compd.* 2011, **509**, 2552.
5. S. Dang, E. Ma, Z.M. Sun and H. J. Zhang, *J. Mater. Chem.* 2012, **22**, 16920.
6. S. Liu, Z. H. Xiang, Z. Hu, X. P. Zheng and D. P. Cao, *J. Mater. Chem.* 2011, **21**, 6649.
7. Y. Li, S. S. Zhang and D. T. Song, *Angew. Chem., Int. Ed.* 2013, **52**, 710.
8. A. J. Lan, K. H. Li, H. H. Wu, D. H. Olson, E. J. Emge, W. Ki, M. C. Hong and J. Li, *Angew. Chem., Int. Ed.* 2009, **48**, 2334.
9. Z. Xie, L. Ma, K. E. deKrafft, A. Jin and W. Lin, *J. Am. Chem. Soc.* 2010, **132**, 922.
10. J. C. Koziar and D. O. Cowan, *Acc. Chem. Res.* **1978**, 334.
